# Supplementary material
Source: PubMed Central journal article supplement (PMC3019823)

# **Supplemental Material**

**Transcription of the YqjH ferric reductase is controlled by Fur and the  
novel regulator YqjI in *E. coli*.**

**Suning Wang, Yun Wu, and F. Wayne Outten\***

**Department of Chemistry and Biochemistry, University of South Carolina,  
Columbia, SC**

## SUPPLEMENTAL FIGURE LEGENDS

Figure S1. Characterization of the YqjH ferric reductase. A. UV-Visible spectra of purified YqjH. B. Fluorescence of YqjH separated by SDS-PAGE. Gel was exposed to acetic acid with or without pretreatment with performic acid. Coomassie-stained gel is shown at left for comparison.

Figure S2. Activity of the *yqjI-lacZ* promoter fusion was measured in triplicate in various strains of *E. coli* grown in LB media at 37°C with increasing amounts of nickel.

Figure S3. Activity of the *yqjH-lacZ* promoter fusion was measured in triplicate in wild-type (open diamonds) or  $\Delta rcnA$  (black diamonds) strains of *E. coli* grown in M9/glucose media at 37°C with increasing amounts of nickel.

Figure S4. Activity of the *yqjH-lacZ* promoter fusion was measured in triplicate in wild-type *E. coli* grown in LB media at 37°C with increasing amounts of nickel.

Figure S5. Genomic neighborhood distribution of *yqjH* and *yqjI* generated by the STRING 8.3 database covering 2,590,259 proteins from 630 organisms (1). Both *yqjH* and *yqjI* from *E. coli* were used for the query.

## SUPPLEMENTAL REFERENCE

1. **Jensen, L. J., M. Kuhn, M. Stark, S. Chaffron, C. Creevey, J. Muller, T. Doerks, P. Julien, A. Roth, M. Simonovic, P. Bork, and C. von Mering.** 2009. STRING 8--a global view on proteins and their functional interactions in 630 organisms. *Nucleic Acids Res* **37**:D412-6.

Table S1. Primers used in this study

| <b>Primer name</b> | <b>Sequence (5'-3')</b>                                                   |
|--------------------|---------------------------------------------------------------------------|
| yqjH_pET21a_up     | AGGCGATACATATGAATAACACCCCCCGC                                             |
| yqjH_pET21a_dn     | TTTTATGGATCCGTTACTTTGCGTGCCA                                              |
| yqjI_pET21a_up     | AGGAGGCTCATATGAGCCATCATCACGAAG                                            |
| yqjI_pET21a_dn     | CCACTGGCGGATCCGGCGATTAATCCAGTT                                            |
| yqjI_58aa_NdeI     | TCGGCACATATGTTTGGTCACGGTGAATTACGTCTG                                      |
| yqjH_287_up        | ATCCGCTCGAGATCAGCCTCCTTTTGCTTAAT                                          |
| yqjH_upstr_L       | CGCGGATCCTGTTATCGCCTTCGTGATGGT                                            |
| yqjI_287_up        | ATCCGCTCGAGTGTATCGCCTTCGTGATGGT                                           |
| yqjI_upstr_L       | CGCGGATCCATCAGCCTCCTTTTGCTTAAT                                            |
| T7 promoter        | TAATACGACTCACTATAGGG                                                      |
| T7 terminator      | GCTAGTTATTGCTCAGCGG                                                       |
| 5'-lacI-Kn         | GGCACGACAGGTTTCCCGACTGGAAAGCGGGCAGTGAGCCG<br>GATCAATTCCCCTGCTCGCGCAGGCTGG |
| 3'-lacZ            | AACTGTTGGGAAGGGCGATCGGTG                                                  |
| pPK7035 seq(150)   | GCTGATCCGGTGGATGACCTTTTGA                                                 |
| Homol Recom Rev    | AACTGTTGGGAAGGGCGATCGGTG                                                  |
| yqjH_PS1           | ATTTAGATATATCTGATTACCATCACGAAGGCGATAACAGTG<br>TAGGCTGGAGCTGCTTC           |
| yqjH_PS2           | TGACGAGAAATCGTCAGCCTTTTTCTTTTTATATATCAGCATA<br>TGAATATCCTCCTTAGT          |
| yqjH_up            | CGTCTTATCAGACTATAGACATATCAG                                               |
| yqjH_dn            | GGTTAGAGCAGGCGACTCATAATC                                                  |
| yqjI_PS1           | ATTAGATATATCTAATTAAGCAAAAAGGAGGCTGATGTGTAGG<br>CTGGAGCTGCTTC              |
| yqjI_PS2           | CGGCAATTGCACCCGCGCCACTGGCGGATGCGGCGACATATGA<br>ATATCCTCCTTAGT             |
| yqjI_up            | TCTGATAAGACGAACCGCCTC                                                     |
| yqjI_dn            | GGTTGGAGCACAATGCCTGATG                                                    |
| fes_PS1            | AACATGGCCCGGAATGGCAGCGTCTGAATGACGAAGTGTAGG<br>CTGGAGCTGCTTC               |
| fes_PS2            | CTGCGGATCATCGAAGGGATTACTGAATGCCATATATATGAAT<br>ATCCTCCTTAGT               |
| fes_up             | AAAGTAGGAAGTGAGAGCTGGTGG                                                  |
| fes_dn             | CCGCAACAATGCGTCTTACC                                                      |
| rcnA_PS1           | ATCAGATTGCCGAATTAATACTAAGAATTATTATCGTGTAGGC<br>TGGAGCTGCTTC               |
| rcnA_PS2           | GGGCTGAAGATAACATGCAAGCCTAAAGGATTGAGATATGAAT<br>ATCCTCCTTAGT               |
| rcnA_up            | ACGACCTGGCCCTGAATCTTAC                                                    |
| rcnA_dn            | CAGTCGCATATCTTTCCTGCCATAC                                                 |
| yqjH_-45~-18       | [F]GTTTTATTAGATATATCTGATTACCAT                                            |

|                       |                                  |
|-----------------------|----------------------------------|
| yqjH_-45~-18RC        | ATGGTAATCAGATATATCTAAATAAAAC     |
| yqjI_-41~14           | [F1]ATATAAATTAGATATATCTAATTAAGCA |
| yqjI_-41~-14RC        | TGCTTAATTAGATATATCTAATTTATAT     |
| yqjH_-81~-54(fur)     | [F1]TGCATTTATCATAAATGATAATGATTGT |
| yqjH_-81~-54(fur) RC  | ACAATCATTATCATTTATGATAAATGCA     |
| (rdm)yqjH_-143~-116   | [F1]TAAGACGAACCGCCTCTTCTCAGGCATC |
| (rdm)yqjH_-143~-116RC | GATGCCTGAGAAGAGGCGGTTCGTCTTA     |

[F1] = 5'-fluorescein labeled

# Figure S1

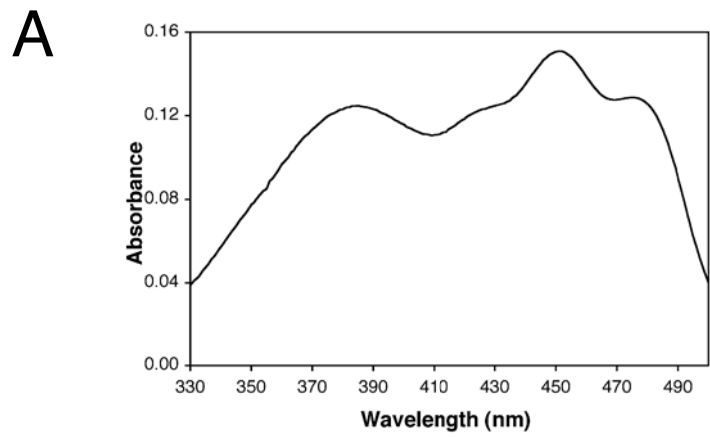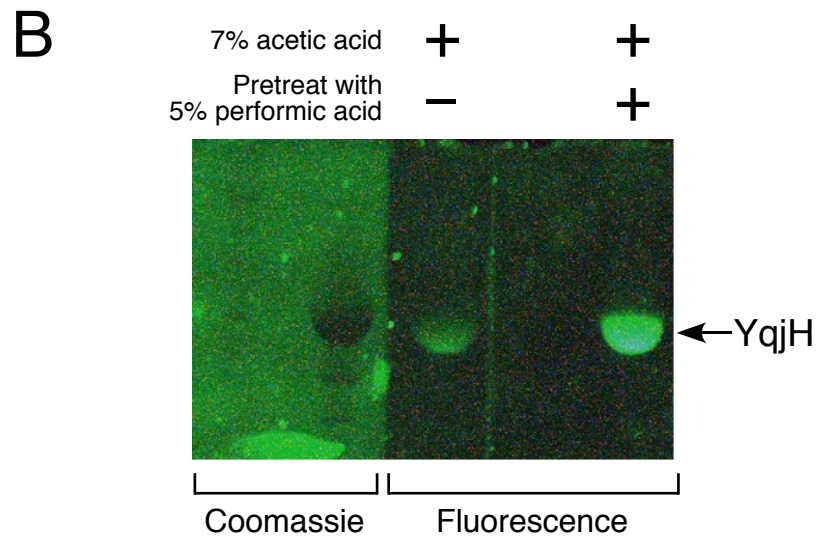

Figure S2

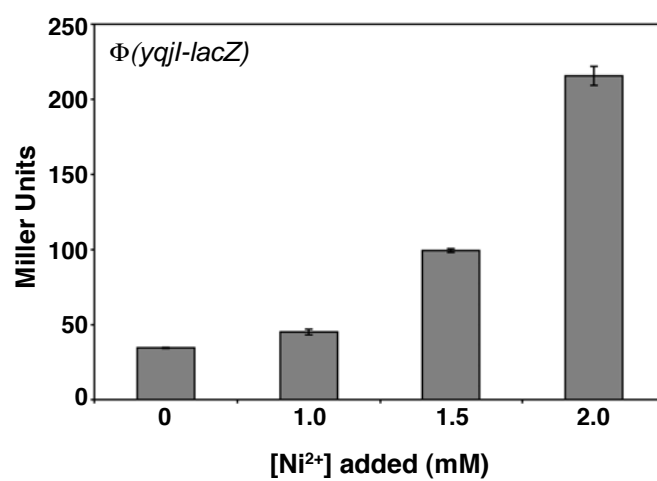

# Figure S3

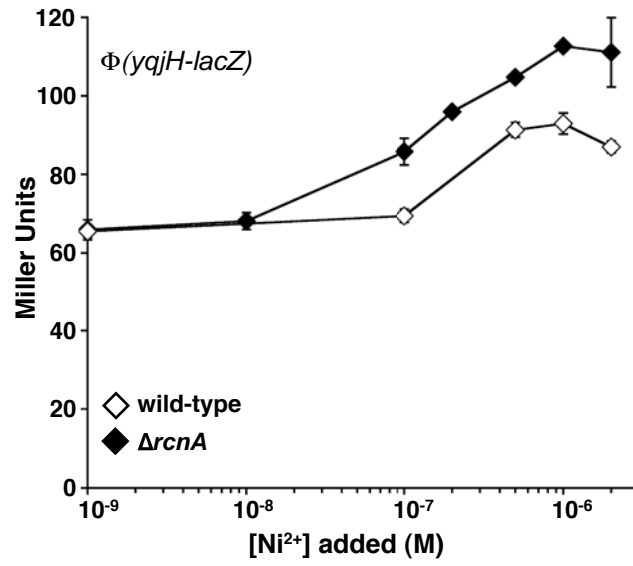



Figure S4

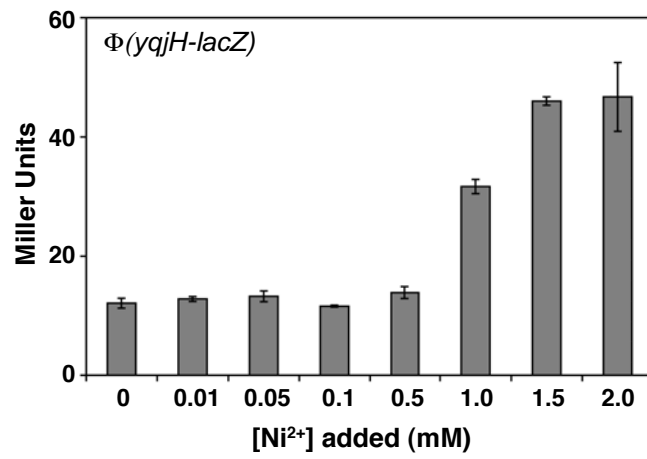

# Figure S5

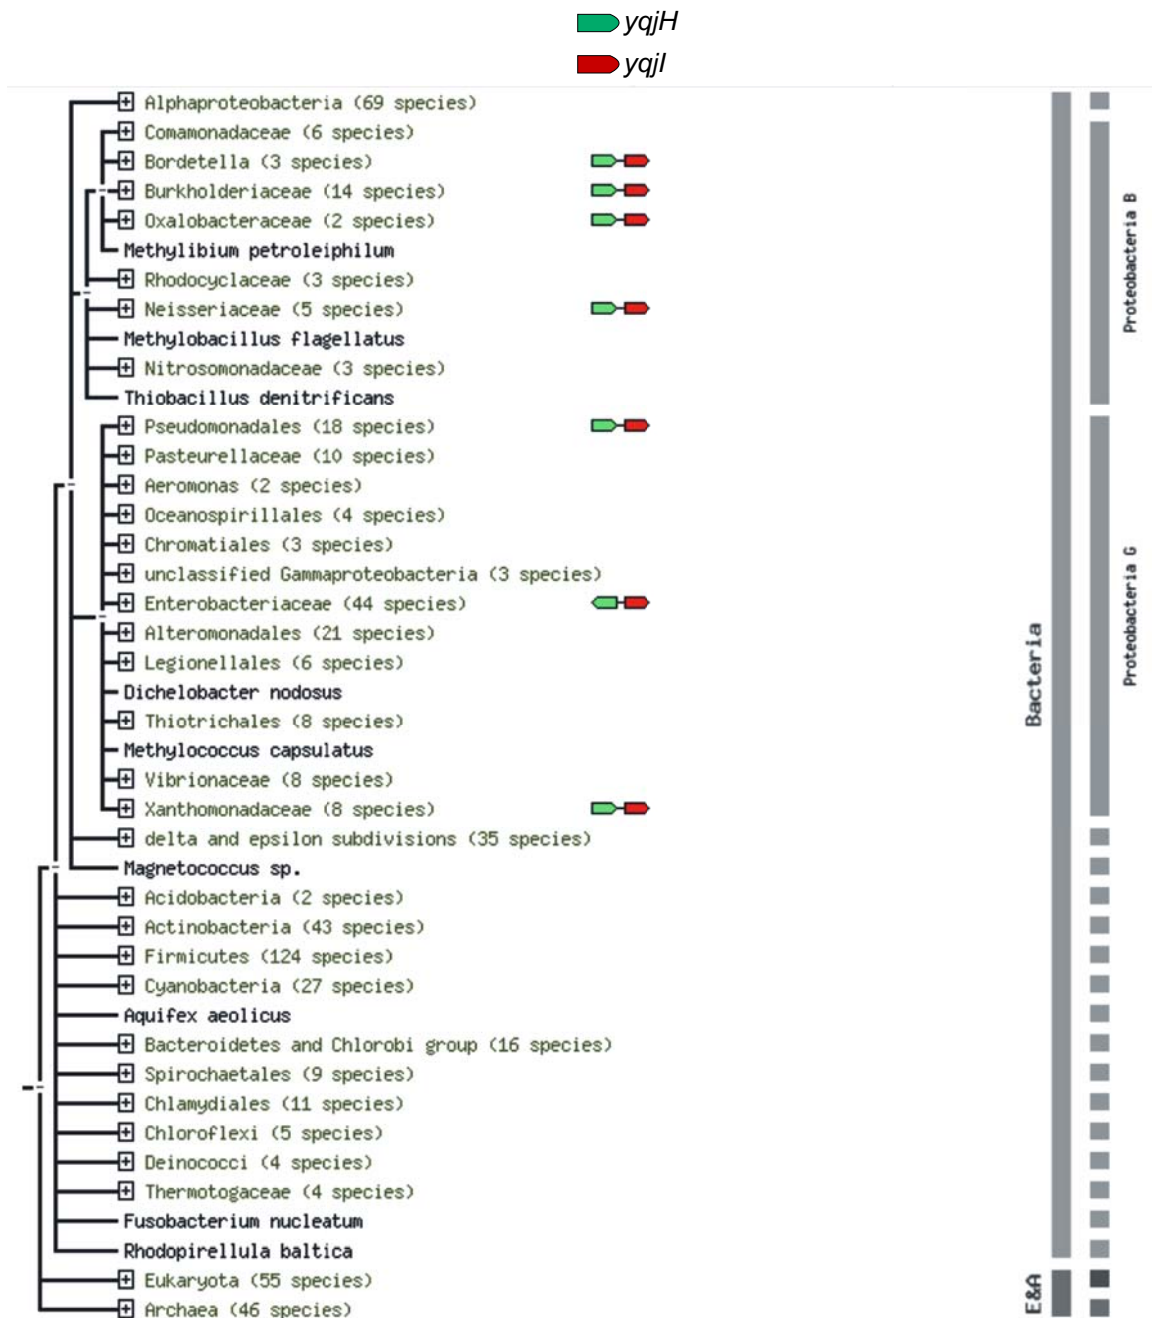

Supplement: supp_193_2_563__1.pdf [file supp_193_2_563__1.pdf]
